# Supplementary material for: Cortical Vein Redness as a Surrogate Marker for Predicting Transient Neurological Events after Revascularization in Adult Moyamoya Disease
Source: Research Square preprint supplement (doi:10.21203/rs.3.rs-7791947/v1), 2025-12-10
Supplement: Supplementary file 1 [file 93265f213432f0a6789a312c.docx]

**Cortical Vein Redness as a Surrogate Marker for Predicting Transient Neurological Events after Revascularization in Adult Moyamoya Disease**

*Neurosurgical Review*

Koki Onodera, M.D., Ph.D.*1, Akio Teranishi, M.D., Ph.D.1, Yushiro Take, M.D., Ph.D.1, Omar F. Jbarah, M.D.1, Hiroki Kurita, M.D., Ph.D1.

***Corresponding Author:**

Department of Cerebrovascular Surgery, Saitama Medical University International Medical Center
1397-1 Yamane, Hidaka, Saitama 350-1298, Japan
Email: [onoderakoki@gmail.com](mailto:onoderakoki@gmail.com)

**Online Resource 1** Postoperative cerebral blood flow ratio in patients with moyamoya disease with and without transient neurological events.

|  | All | TNEs (+) | TNEs (-) |  |
| --- | --- | --- | --- | --- |
| No. | 11 | 6 | 5 | p value |
| Postoperative CBF ratio at the MCA territory | 1.40 (1.21–1.64) | 1.50 (1.32–1.71) | 1.40 (1.10–1.50) | 0.33 |
| Postoperative CBF ratio at the site of anastomosis | 1.89 (1.57–2.40) | 1.98 (1.77–2.26) | 1.89 (1.40–2.50) | 1 |

CBF, cerebral blood flow; MCA, middle cerebral artery; TNEs, transient neurological events

Values are expressed as median (interquartile range).
